# Supplementary material for: Fabrication and Investigation of PE-SiO2@PZS Composite Separator for Lithium-Ion Batteries
Source: MDPI journal article supplement (doi:10.3390/ma15144875), 2022-07-13
Supplement: s1 [file s1]

*Supporting Information*

# Fabrication and Investigation of PE-SiO<sub>2</sub>@PZS Composite Separator for Lithium-Ion Batteries

Liguo Xu <sup>1,2</sup>, Yanwu Chen<sup>1</sup>, Peijiang Liu <sup>2,\*</sup> and Jianghua Zhan <sup>3,\*</sup>

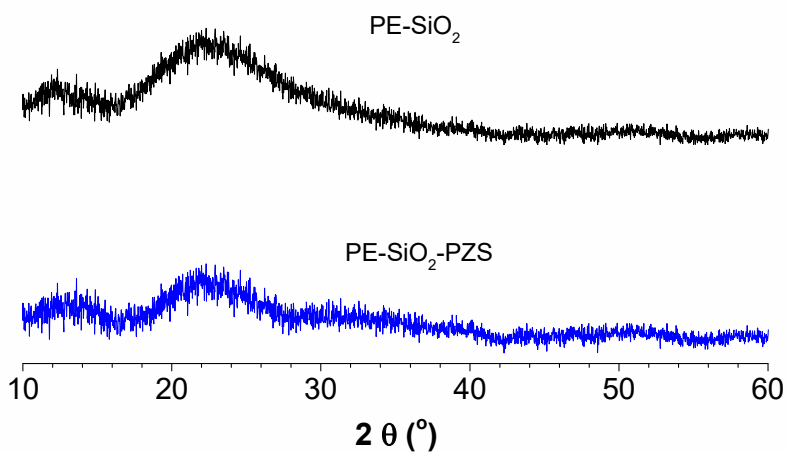

**Figure S1.** XRD curves for PE-SiO<sub>2</sub> and PE-SiO<sub>2</sub>@PZS-1 composite membranes.
